# Supplementary material for: BMP suppresses WNT to integrate patterning of orthogonal body axes in adult planarians
Source: PubMed Central journal article supplement (PMC9882038; doi:10.1101/2023.01.10.523528), 2023-01-12
Supplement: NIHPP2023.01.10.523528v1-supplement-1.pdf [file NIHPP2023.01.10.523528v1-supplement-1.pdf]

**Figure S1**

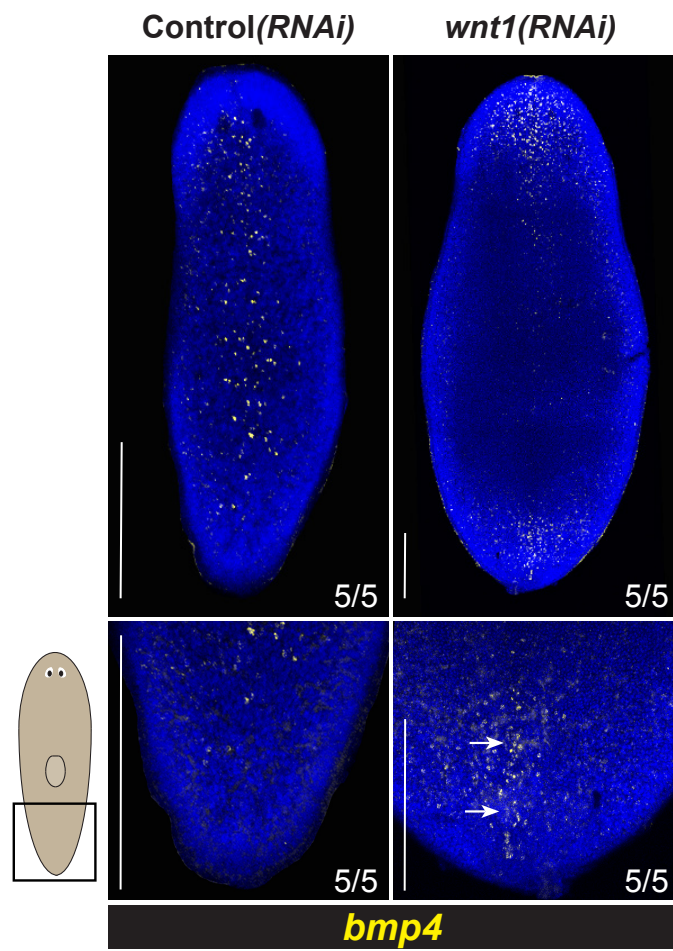

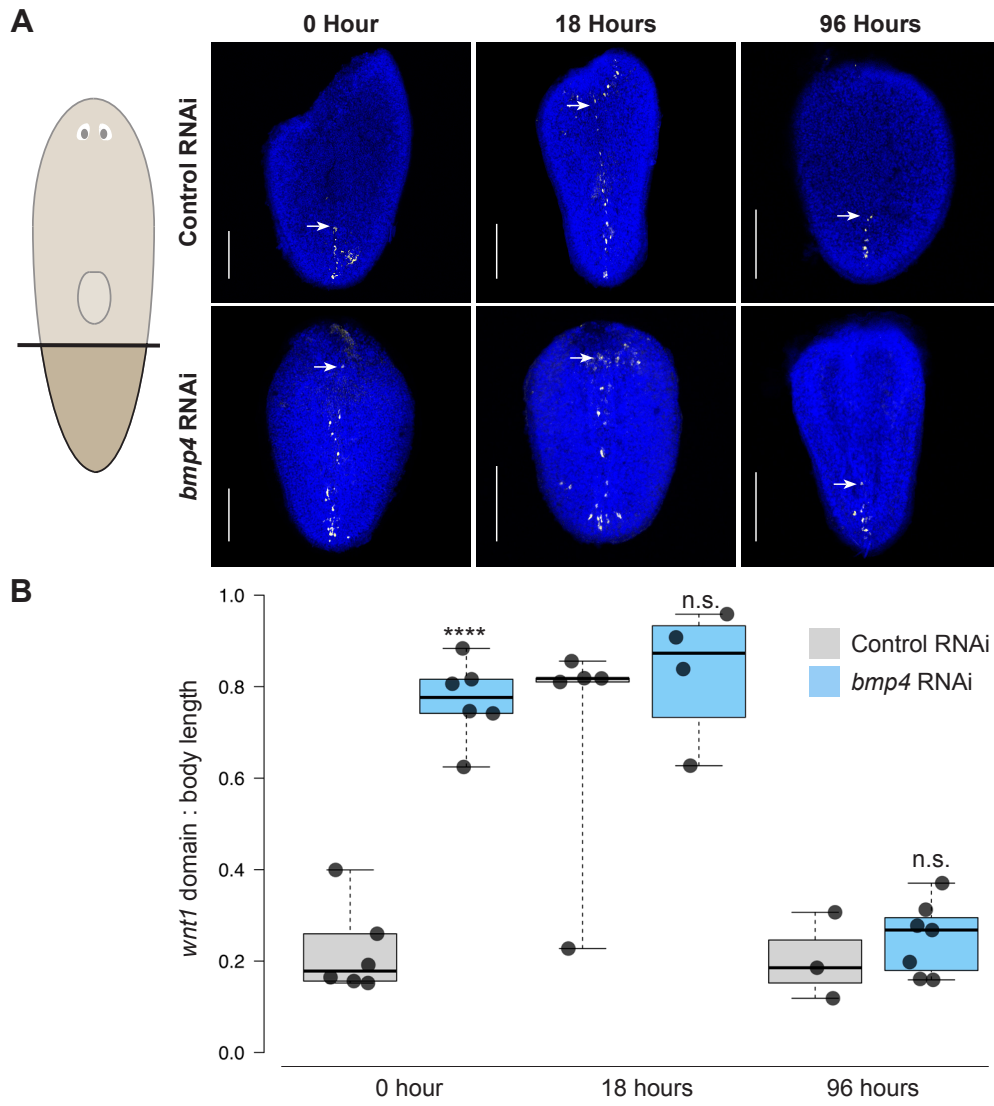

## Figure S3

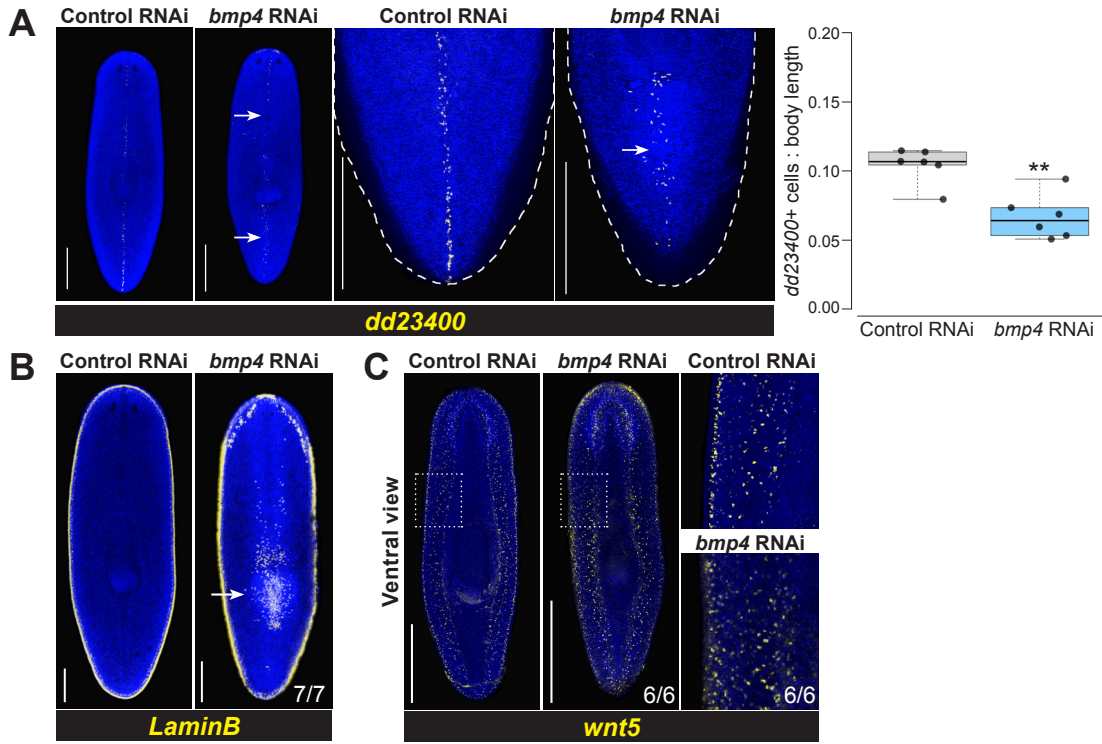

## Figure S4

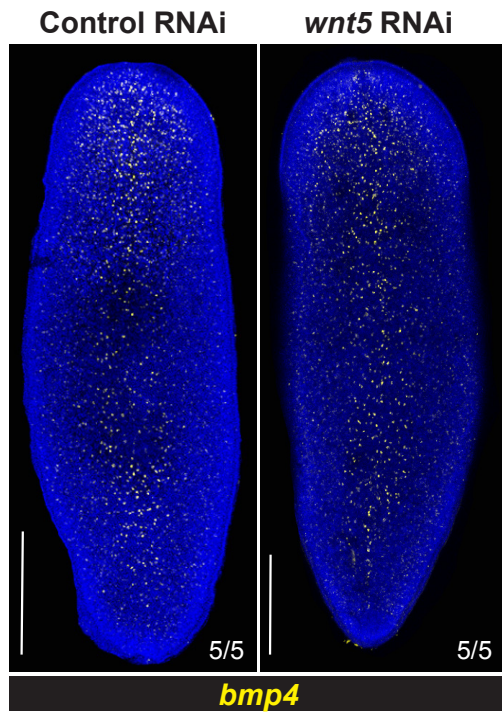

**Table S1. Primer sequences**

| Gene name      | ddv6                 | Left Primer              | Right Primer               |
|----------------|----------------------|--------------------------|----------------------------|
| <i>bmp4</i>    | dd_Smed_v6_17402_0_1 | TCCATCAGAGAAAGTTCGCAGT   | ACGAATGTACAGTTTCAGTTGCA    |
| <i>bambi-2</i> | dd_Smed_v6_23400_0_1 | GCCCATCAGATGTCCGCTTA     | TTTTCCAACACAGTGCAACACA     |
| <i>wnt1</i>    | dd_Smed_v6_28398_0_1 | CCTCAAAATCGAATTTTACTCA   | TGGGACAAAAATAAAATTCACA     |
| <i>smad1</i>   | dd_Smed_v6_6877_0_1  | CATCTCCGGCTGTTAAACGG     | CCACAAGAATAAAGCAAATGGCA    |
| <i>smad4</i>   | dd_Smed_v6_1923_0_1  | CTTCAAATTGCCGGCGAAA      | TCGAGTATCGCGCTGATTCC       |
| <i>tbx2/3</i>  | dd_Smed_v6_11693_0_1 | GCTTCGTTTCTGCCGAGTTT     | CGGATGGGTTTTGAATCGCG       |
| <i>nlg8</i>    | dd_Smed_v6_8738_0_1  | CCTCCACGTGAATCCACAGT     | TCGGTTTCCAGAAGTGAAGAA      |
| <i>notum</i>   | dd_Smed_v6_24180_0_1 | AAAATTTCTGAGGATCGAAAAA   | TGAAGCTAGATTTATGTGAAAAACCA |
| <i>sfrp-1</i>  | dd_Smed_v6_13985_0_1 | TTGAATTCATGGAAATGACCAA   | AATCAATGAAATGTTTTGTTGTA    |
| <i>ndl-5</i>   | dd_Smed_v6_5102_0_1  | ACAGTATTTCTTAACACGGGTCA  | TGAACCATACGGAGCGGT         |
| <i>wntP-2</i>  | dd_Smed_v6_7326_0_1  | TAAATGTTCTAAGCCAAAACAACA | AAAATTTTATGATCAATCTGAATGC  |
| <i>fzd4-1</i>  | dd_Smed_v6_11650_0_1 | GGAATAGCCCAACTCACCAA     | TGCCGAATTTAGTTGGAAGC       |
| <i>wnt11-1</i> | dd_Smed_v6_14391_0_1 | CATGAGCCAGTAAATGAAATGGT  | TAGCACTGCGTTGGTGTGTTG      |
| <i>wn11-2</i>  | dd_Smed_v6_16209_0_1 | TTGATCGCATGAAAAATTACAAA  | CCATTGCAATAAAATGTCCA       |
| <i>kal-1</i>   | dd_Smed_v6_6746_0_1  | CGAGTTCTGAACCTGGCTGT     | GTTTCCCCTCCTGTGTTGAA       |
| <i>slit</i>    | dd_Smed_v6_12111_0_1 | TCCGTGACAATCAGCTGCAA     | AAGCCGATGATTGCCGAGAA       |
| <i>wnt5</i>    | dd_Smed_v6_15469_0_1 | TCGGGGTGACCTTTTACTCA     | TGAACCCATTGCAGTGAAAA       |
| <i>laminB</i>  | dd_Smed_v6_3065_0_1  | AGTTCAACTCCTGGCGCTAC     | CTGAACATTCGGATCACCT        |
